# Supplementary material
Source: PubMed Central journal article supplement (PMC11307403)
Supplement: mmc1.pdf [file mmc1.pdf]

**Supplemental Table 1. List of oligonucleotide primers for qPCR.**

| Gene name     | FWD primer (5' - 3')    | REV primer (5' - 3')      |
|---------------|-------------------------|---------------------------|
| <i>Acaca</i>  | ATGGGCGGAATGGTCTCTTTC   | TGGGGACCTTGTCTTCATCAT     |
| <i>Acacb</i>  | CGCTCACCAACAGTAAGGTGG   | GCTTGGCAGGGAGTTCCTC       |
| <i>Acs1</i>   | TGGGGTGGAAATCATCAGCC    | CACAGCATTACACACTGTACAACGG |
| <i>Acs3</i>   | GGGACTACAATACCGGCAGAGT  | AATAGCCACCTTCCCTCCAGTT    |
| <i>Acs4</i>   | AAATGCAGCCAAATGGAAAG    | CACTCTGCAGTTCACCTCAA      |
| <i>Acs5</i>   | ATCTGCCTCCTGACGTTTGG    | GCTCCTCCCTCAATCCCCAC      |
| <i>Acta2</i>  | GTCCCAGACATCAGGGAGTAA   | TCGGATACTTCAGCGTCAGGA     |
| <i>Adgre1</i> | CCTGATGGTGAGAAACCTGA    | CCCCAGGAAACTCCAGATAA      |
| <i>Col1a1</i> | GCTCCTCTTAGGGGCCACT     | CCACGTCTCACCATTGGGG       |
| <i>Col3a1</i> | CTGTAACATGGAAACTGGGGAAA | CCATAGCTGAACTGAAAACCACC   |
| <i>Fasn</i>   | GTCTGGAAAGCTGAAGGATCTC  | TGCCTCTGAACCACTCACAC      |
| <i>Mboat7</i> | ATCCGTAACATCGACTGCTATGG | CGGAAAGGTGCGCTCTTGTA      |
| <i>Mmp2</i>   | ACCTGAACACTTTCTATGGCTG  | CTTCCGCATGGTCTCGATG       |
| <i>Timp1</i>  | CGAGACCACCTTATACCAGCG   | ATGACTGGGGTGTAGGCGTA      |
| <i>Rplp0</i>  | AGATTCGGGATATGCTGTTGGC  | TCGGGTCCTAGACCAGTGTTT     |
| <i>Scd1</i>   | TTCTTGCGATACTCTGGTGC    | CGGGATTGAATGTTCTTGTCGT    |
| <i>Srebf1</i> | GGCACTAAGTGCCCTCAACCT   | GCCACATAGATCTCTGCCAGTGT   |
| <i>Tgfb1</i>  | CTCCCGTGGCTTCTAGTGC     | GCCTTAGTTTGGACAGGATCTG    |
| <i>Tnf</i>    | CCCTCACACTCAGATCATCTTCT | GCTACGACGTGGGCTACAG       |
