# Supplementary material
Source: PubMed Central journal article supplement (PMC11307403)
Supplement: mmc2.pdf [file mmc2.pdf]

**Supplemental Table 2. List of antibodies used for western blot analyses or immunofluorescence imaging.**

| Antibody                   | Host   | Source                        | Catalog/Ref. # |
|----------------------------|--------|-------------------------------|----------------|
| $\alpha$ -Tubulin          | Rabbit | Cell Signaling Technology     | 2125S          |
| $\beta$ -Actin             | Rabbit | Cell Signaling Technology     | 4970S          |
| ACSL1                      | Rabbit | Proteintech                   | 13989-1-AP     |
| ACSL4                      | Rabbit | MilliporeSigma                | SAB2100035     |
| Calnexin                   | Rabbit | Enzo                          | ADI-SPA-860    |
| LDHA                       | Rabbit | Cell Signaling Technology     | 2012S          |
| MBOAT7                     | Rat    | Custom made monoclonal (FT10) | PMID: 23097495 |
| PLIN2 (ADFP)               | Rabbit | Abcam                         | ab108323       |
| VDAC                       | Rabbit | Cell Signaling                | D73D12         |
| Anti-Rabbit 680RD          | Donkey | LiCor                         | 926-69073      |
| Anti-Rabbit 800CW          | Donkey | LiCor                         | 926-32213      |
| Anti-Rat 800CW             | Goat   | LiCor                         | 926-32219      |
| Anti-Rat dyLight 488       | Goat   | Abcam                         | ab96971        |
| Anti-Rabbit AlexaFluor 594 | Goat   | Invitrogen                    | A32740         |
