# Supplementary material
Source: PubMed Central journal article supplement (PMC11307403)

Supplemental Figure 8

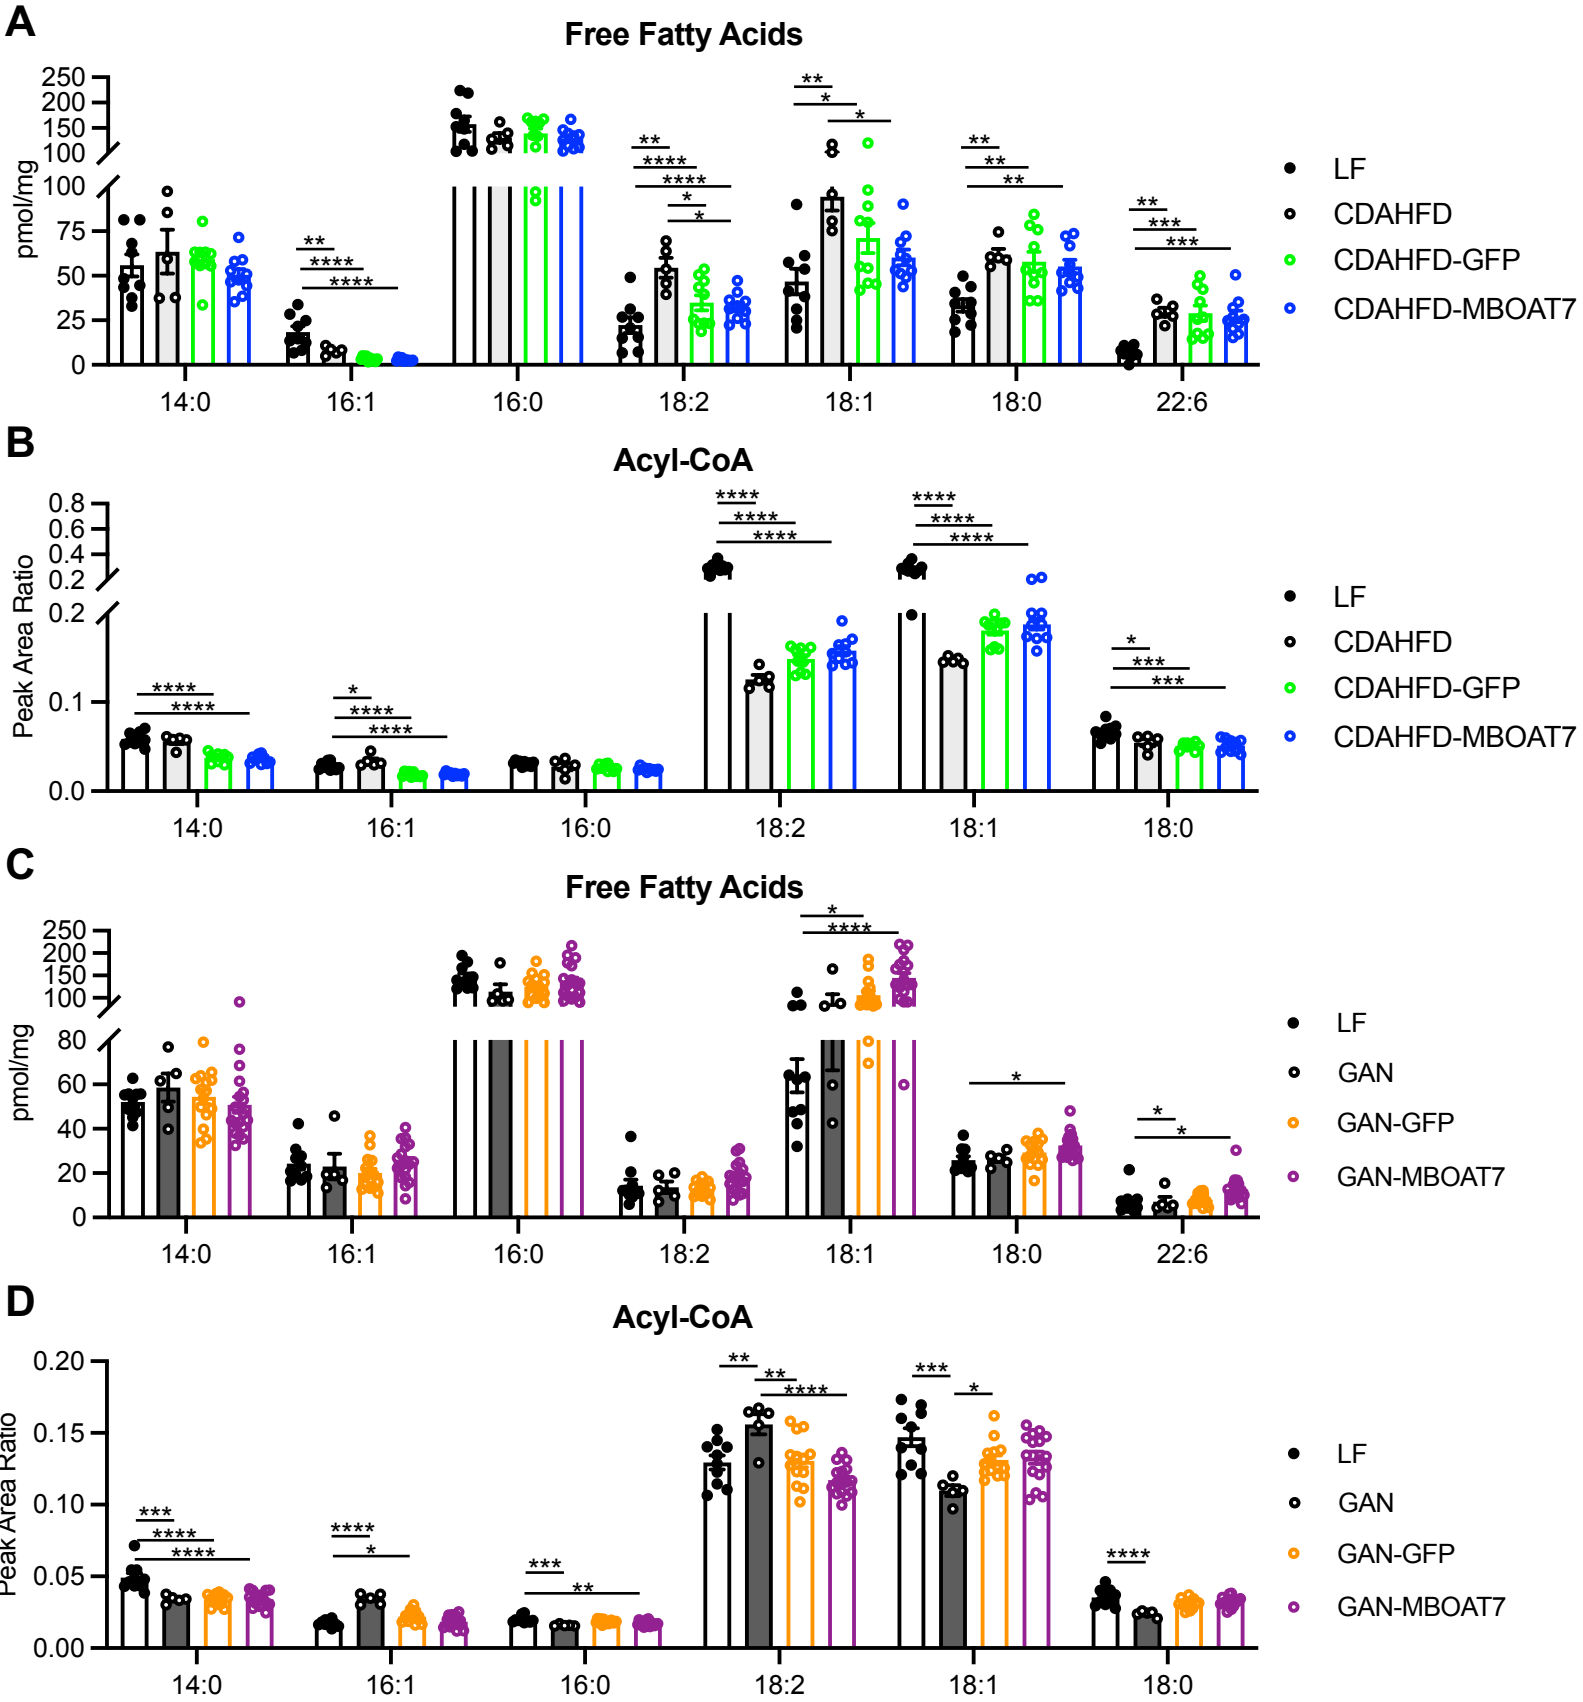

Supplement: mmc10.pdf [file mmc10.pdf]

Supplemental Figure 1

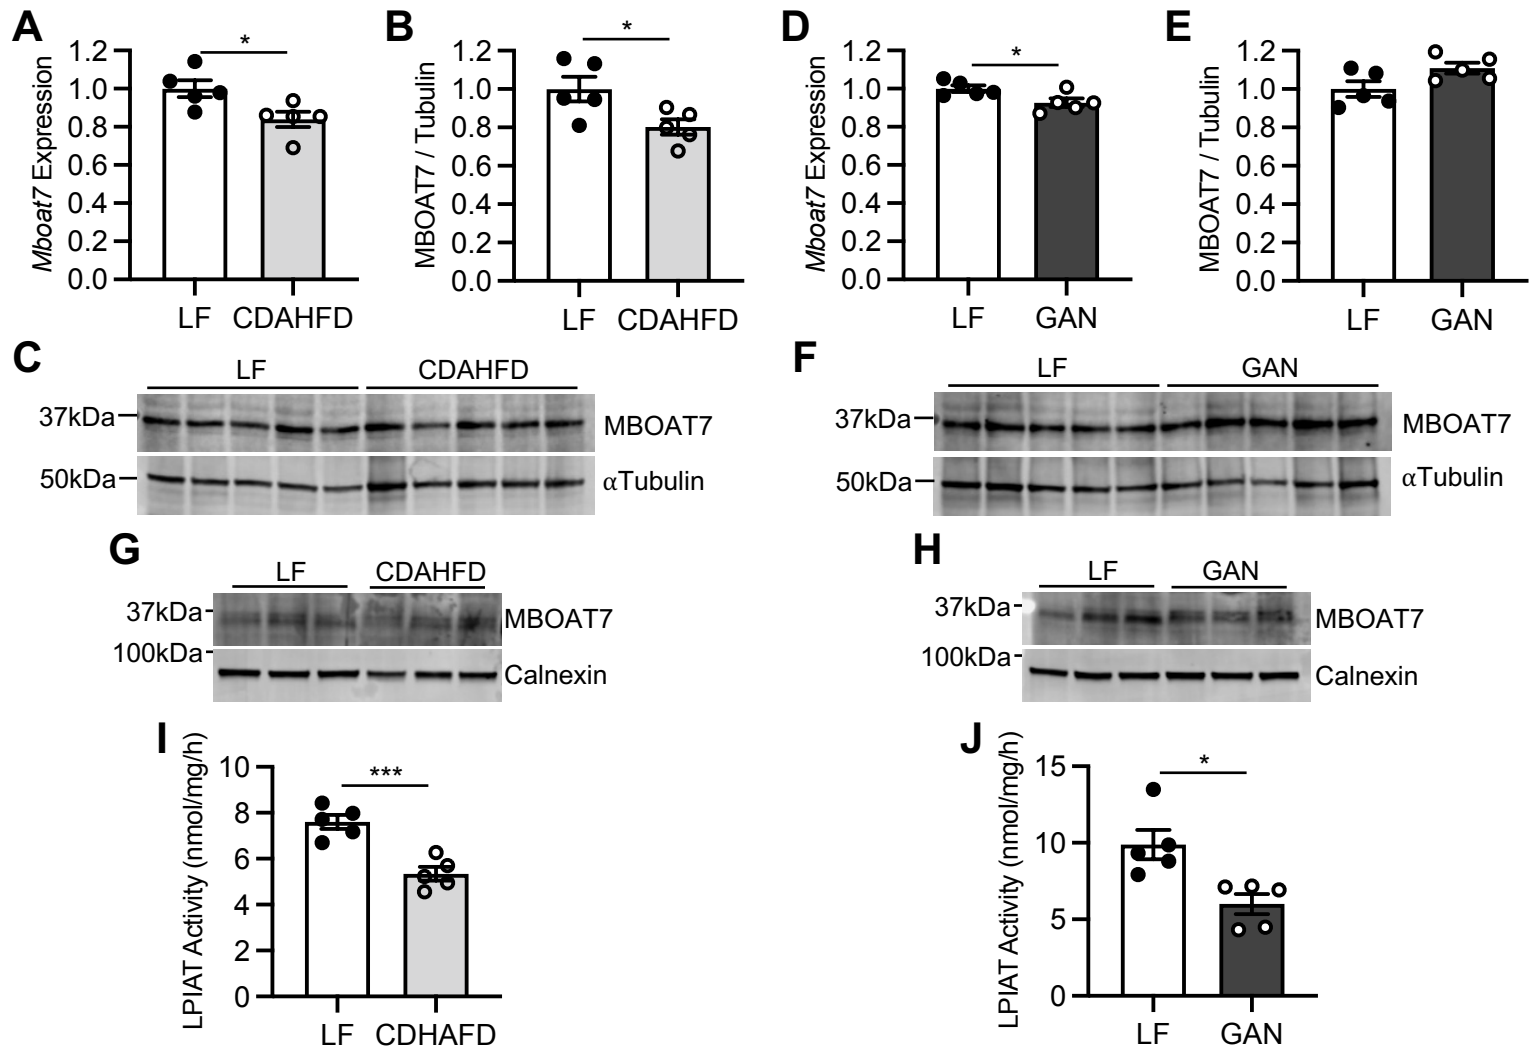

Supplement: mmc3.pdf [file mmc3.pdf]

Supplemental Figure 2

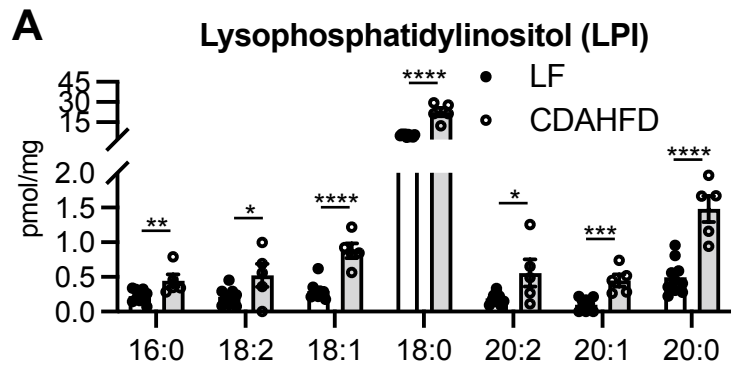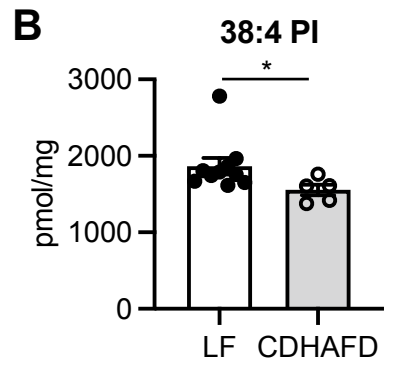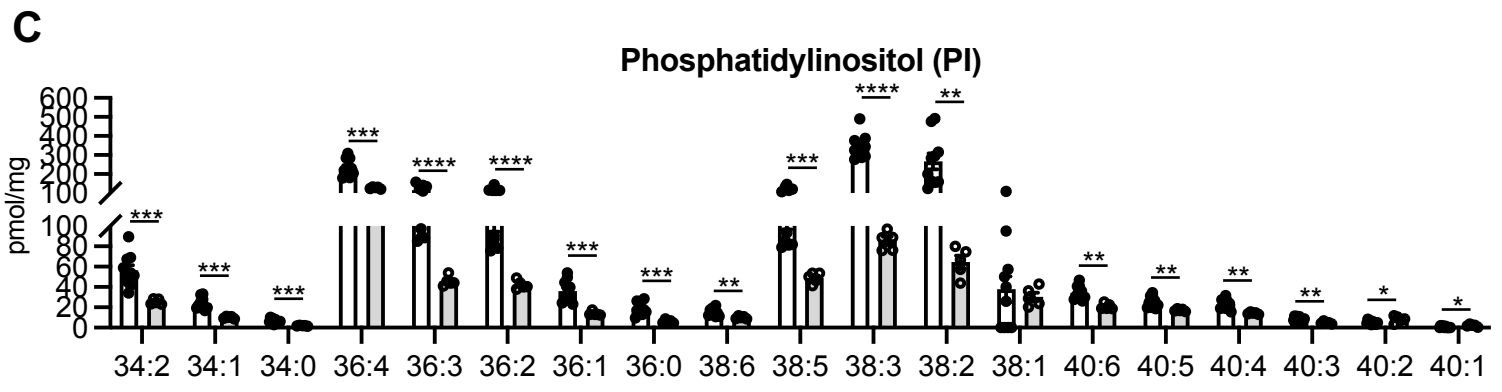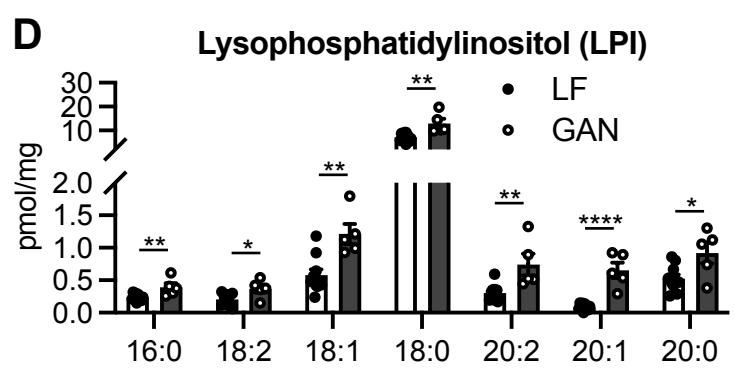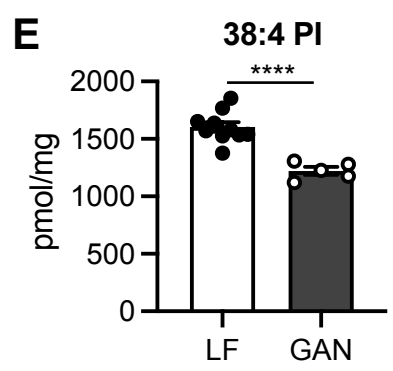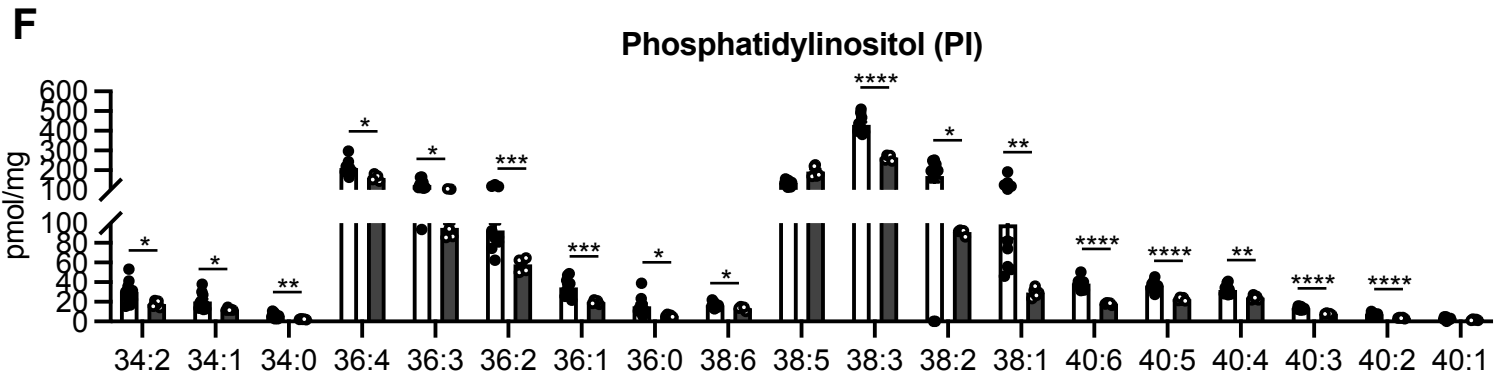

Supplement: mmc4.pdf [file mmc4.pdf]

Supplemental Figure 3

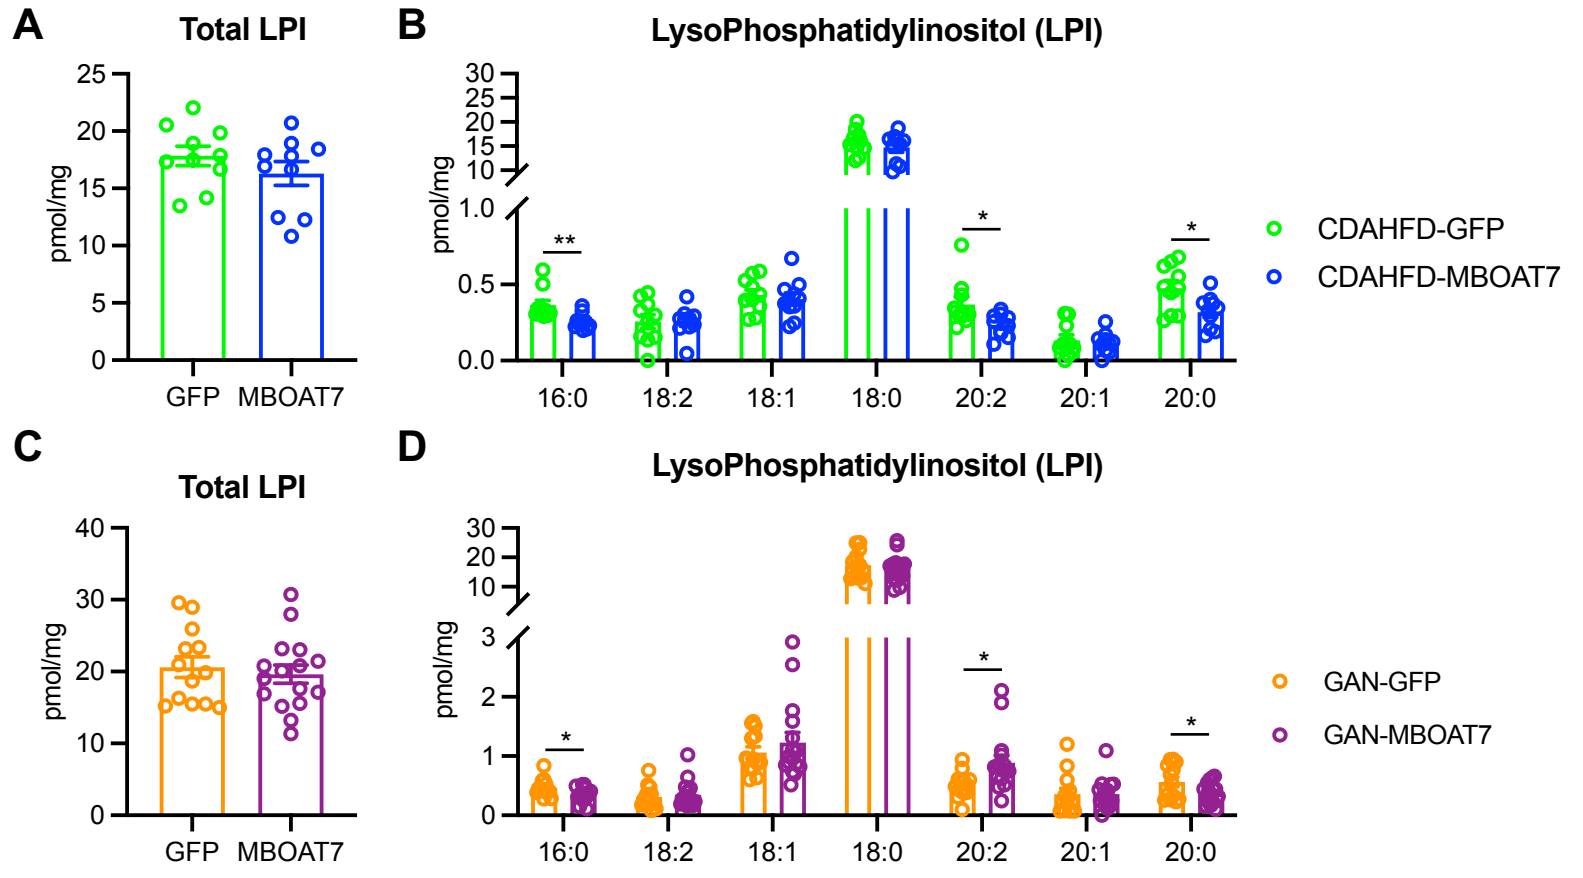

Supplement: mmc5.pdf [file mmc5.pdf]

Supplemental Figure 4

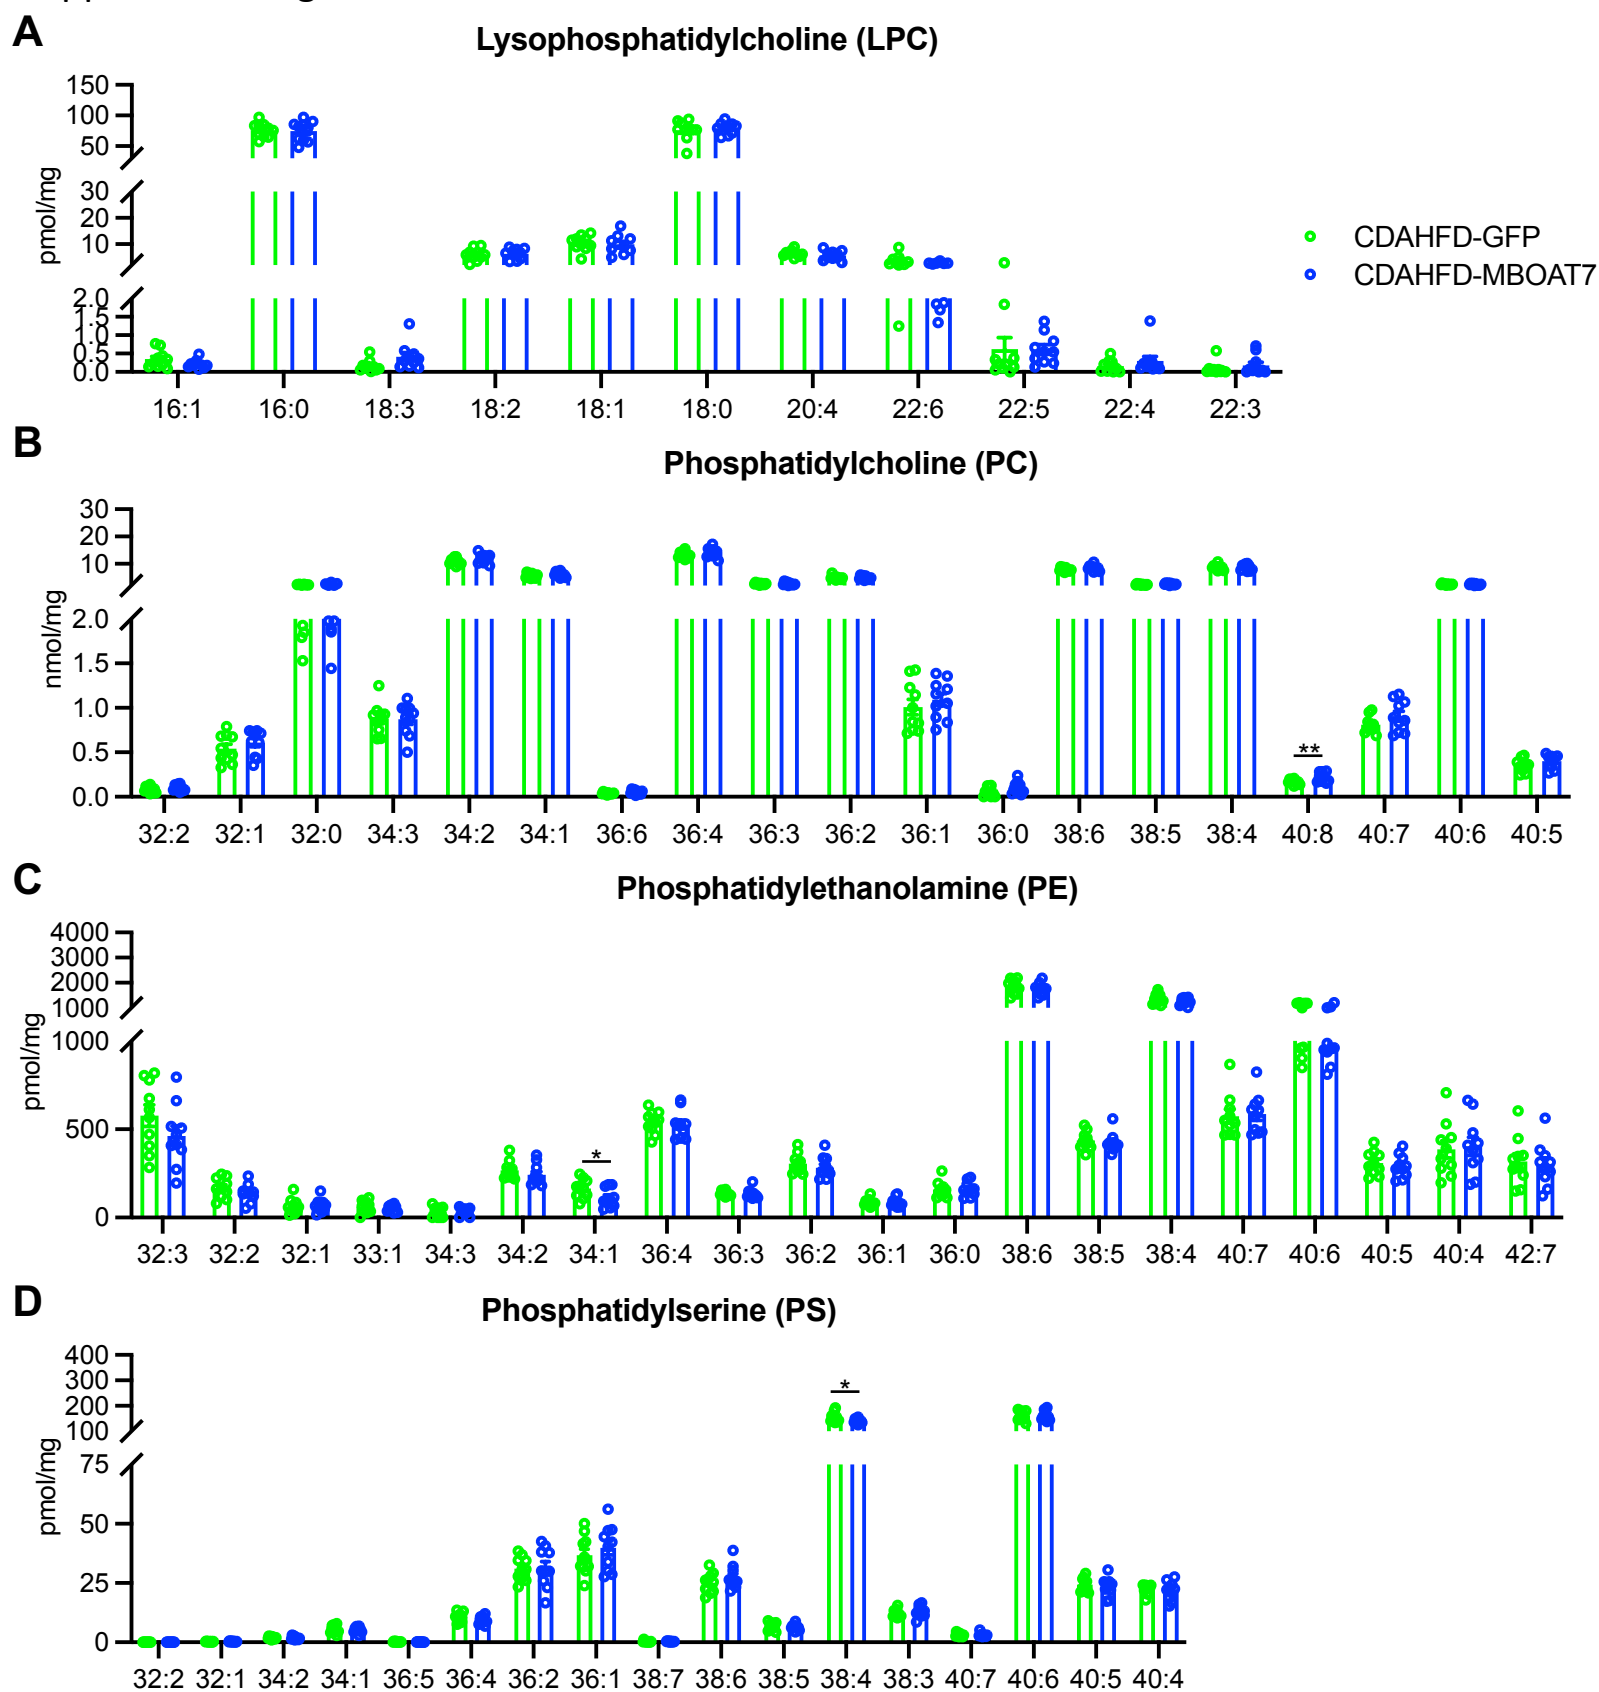

Supplement: mmc6.pdf [file mmc6.pdf]

Supplemental Figure 5

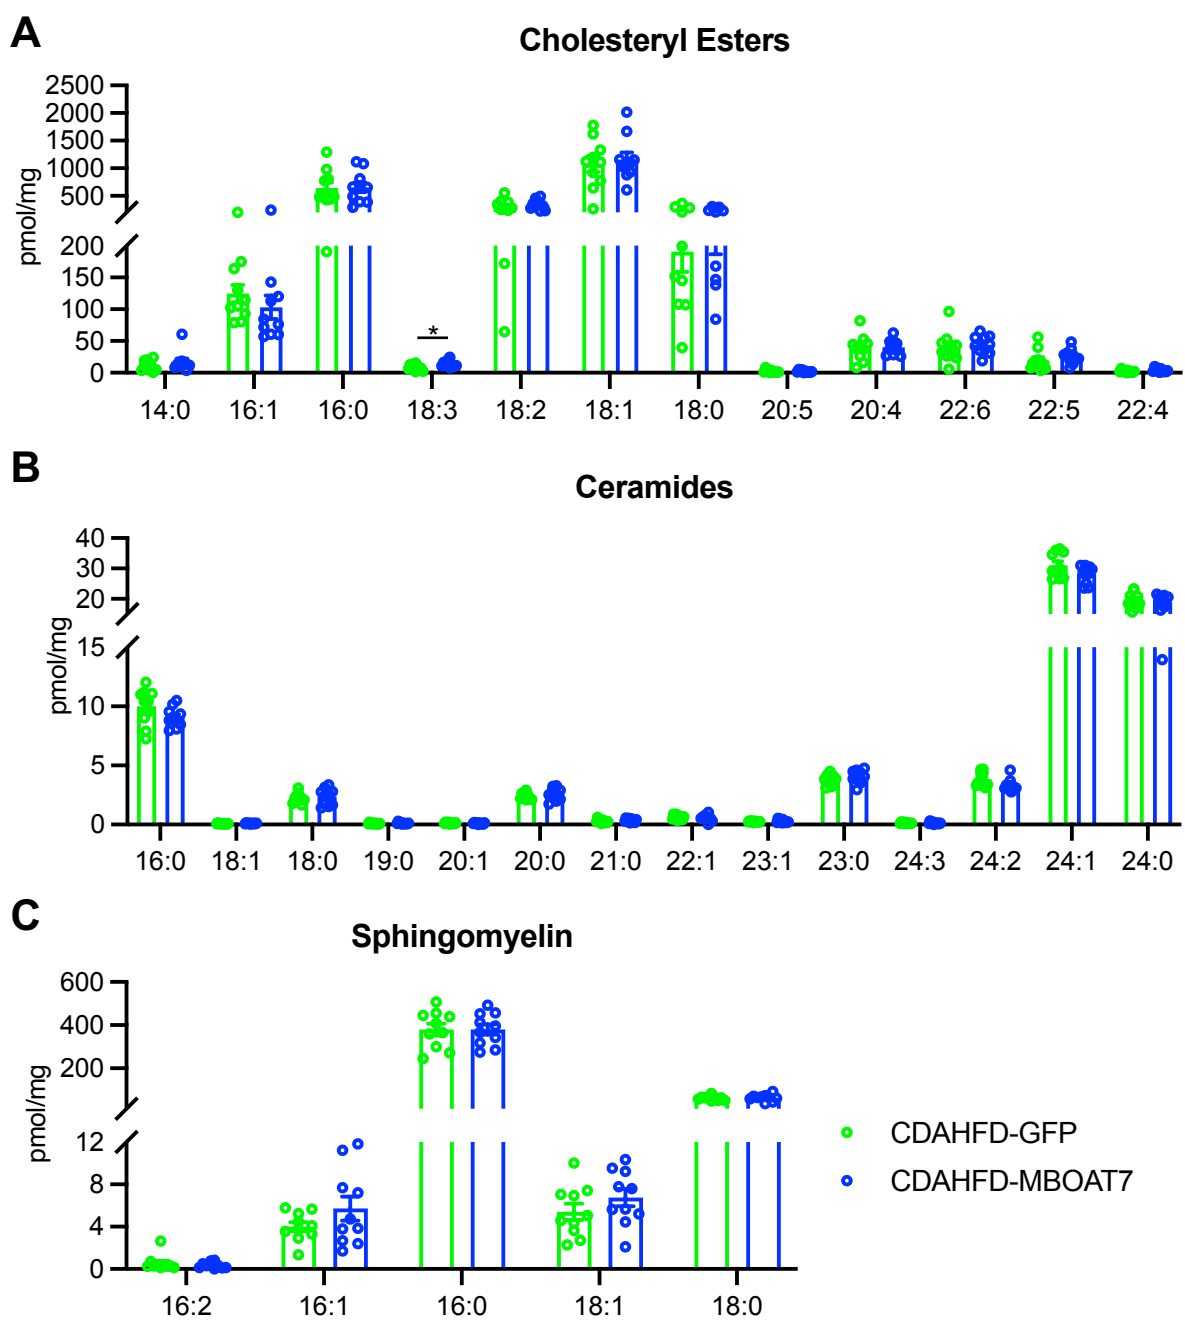

Supplement: mmc7.pdf [file mmc7.pdf]

Supplemental Figure 6

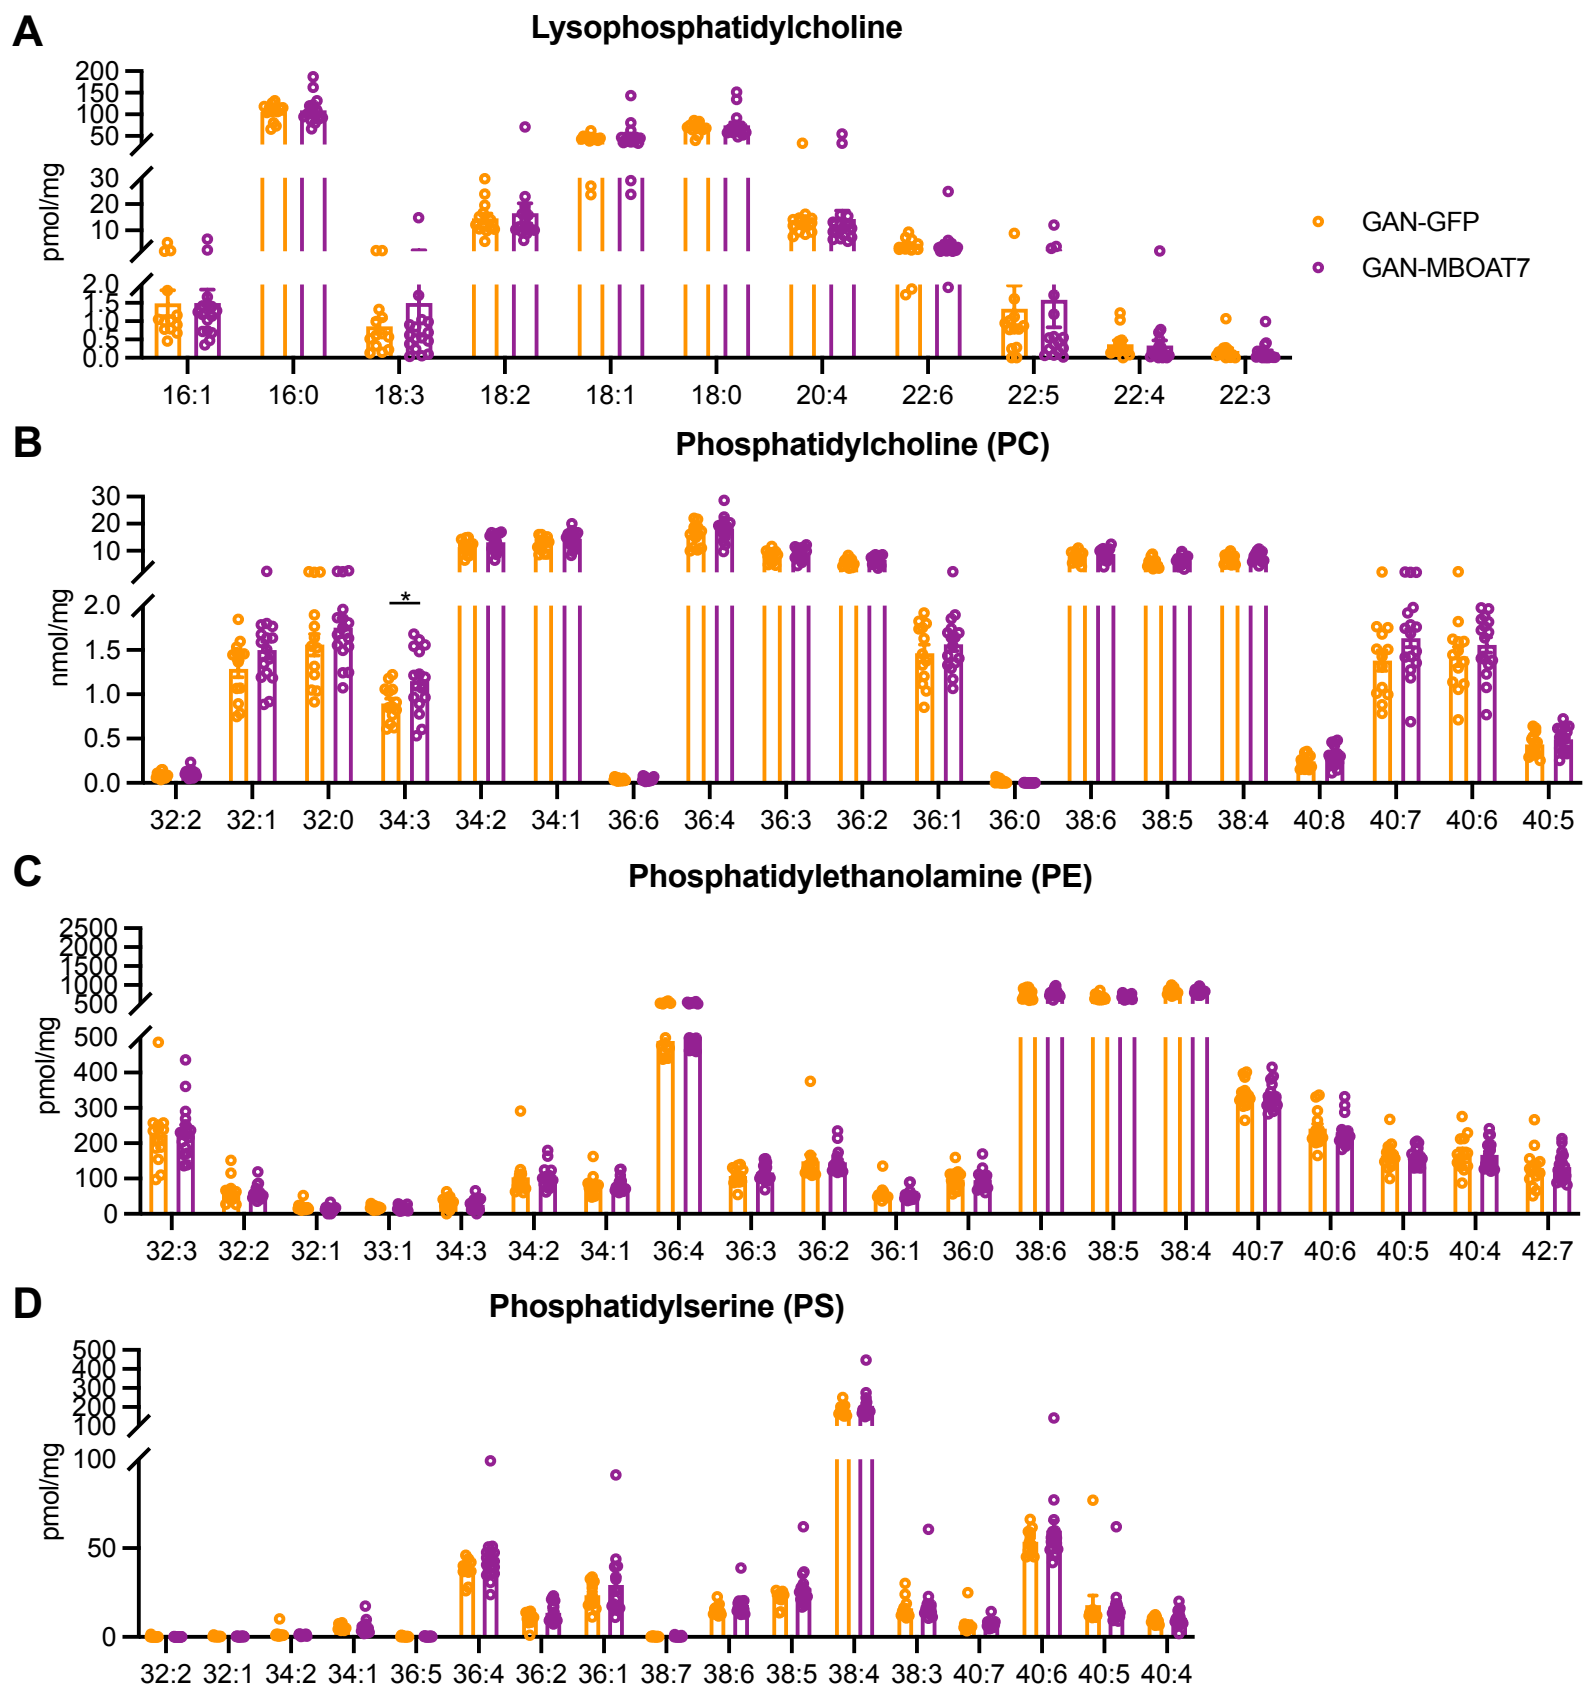

Supplement: mmc8.pdf [file mmc8.pdf]

Supplemental Figure 7

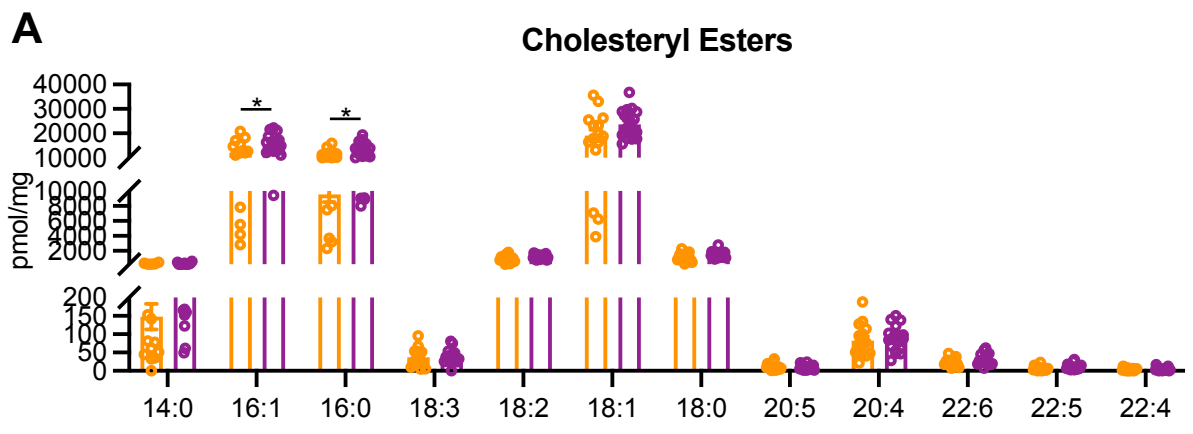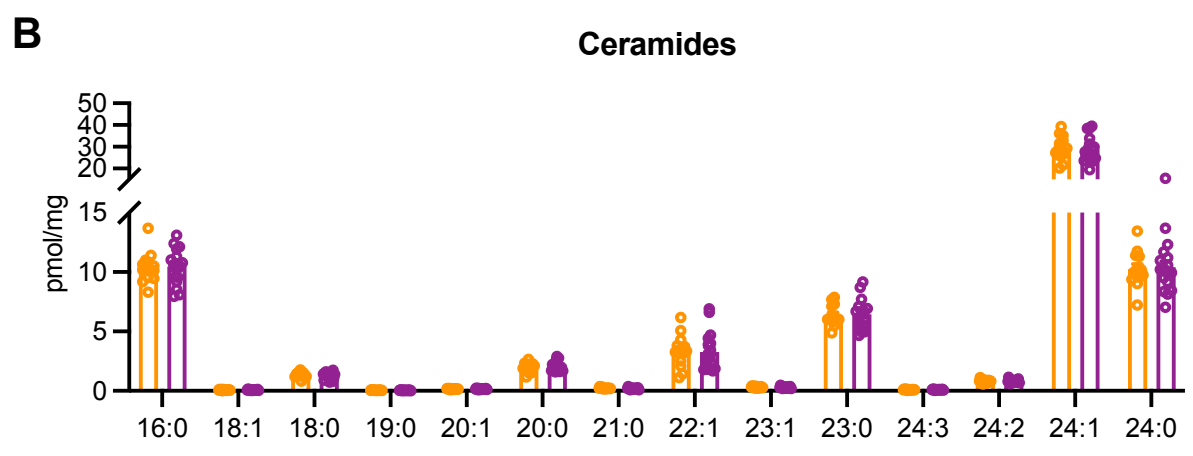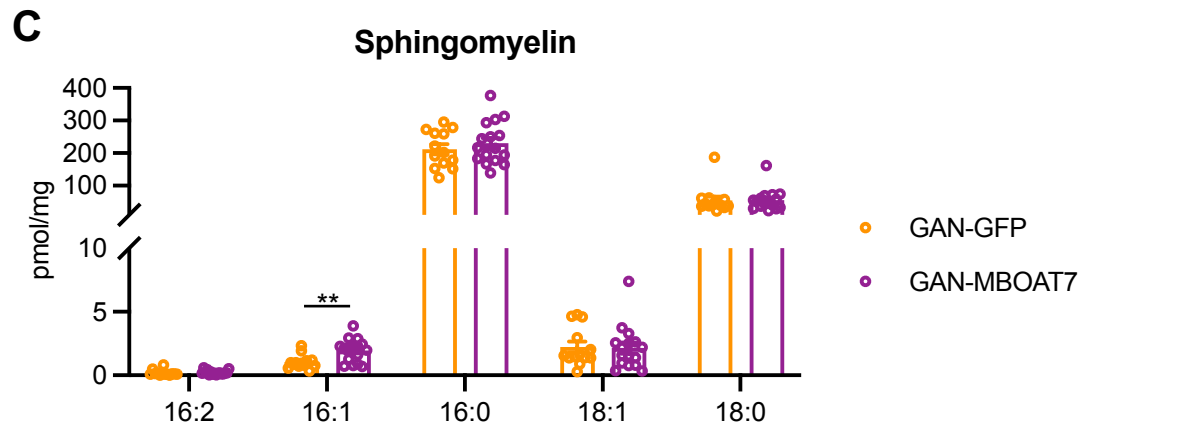

Supplement: mmc9.pdf [file mmc9.pdf]
